# Supplementary material for: Bioenergetic Alterations of Metabolic Redox Coenzymes as NADH, FAD and FMN by Means of Fluorescence Lifetime Imaging Techniques
Source: MDPI journal article supplement (doi:10.3390/ijms22115952), 2021-05-31
Supplement: s1 [file s1]

## Supplementary Materials

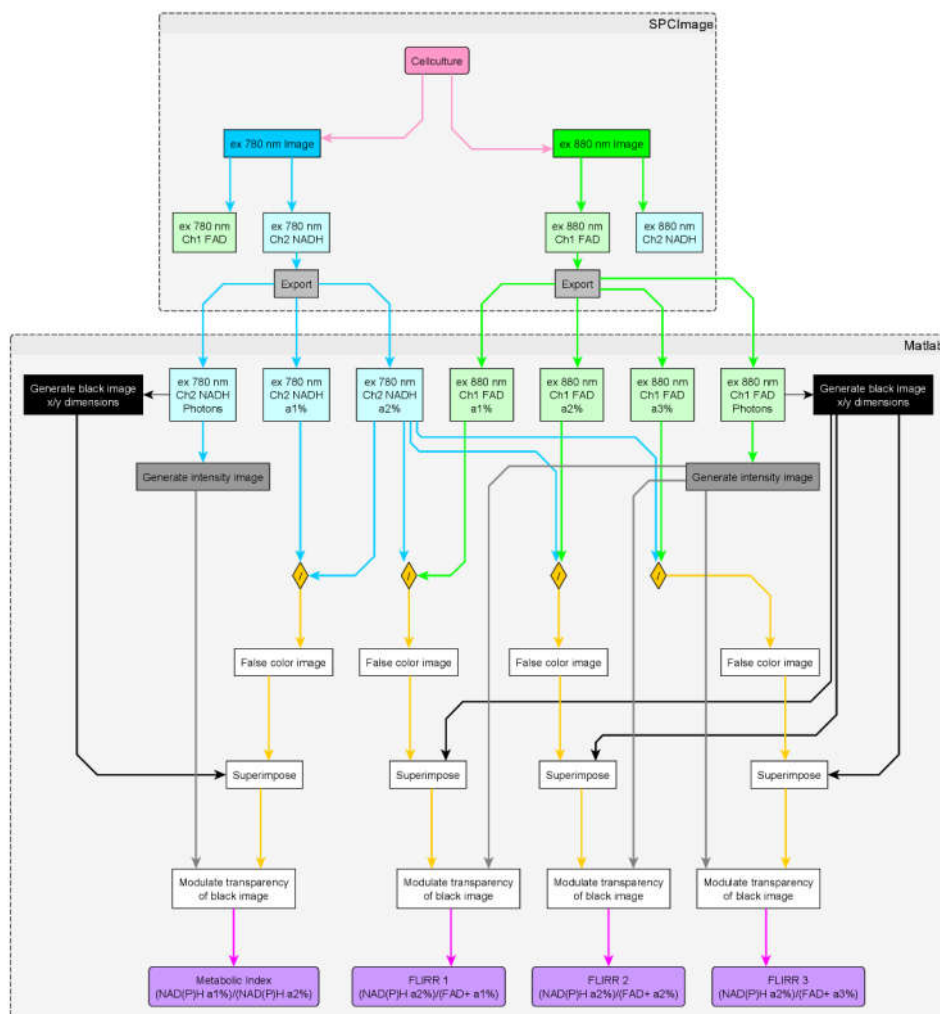

**Supplementary Figure S1. Flow diagram of workflow to establish the metabolic index and FLIRR 1, FLIRR 2 and FLIRR 3 false color images.** After completion of image analysis in SPCImage as described in section 3.2. “FLIM data analysis” the relative amplitudes of the fit functions to the NAD(P)H and FAD channels and the intensity image which represents the photon counts per pixel are exported using the SPCImage export dialog. The exported data matrixes are imported into Matlab and the Metabolic Index and FLIRR 1 to 3 indices calculated, according to the formulas described in section 3.2. A color map is applied to the resulting matrixes to create false color images which are then superimposed by the inverted intensity image to create the final images.
